# Supplementary material for: Cross-Dressing of Multiple Myeloma Cells Mediated by Extracellular Vesicles Conveying MIC and ULBP Ligands Promotes NK Cell Killing
Source: MDPI journal article supplement (doi:10.3390/ijms24119467), 2023-05-30
Supplement: s1 [file s1]

**a**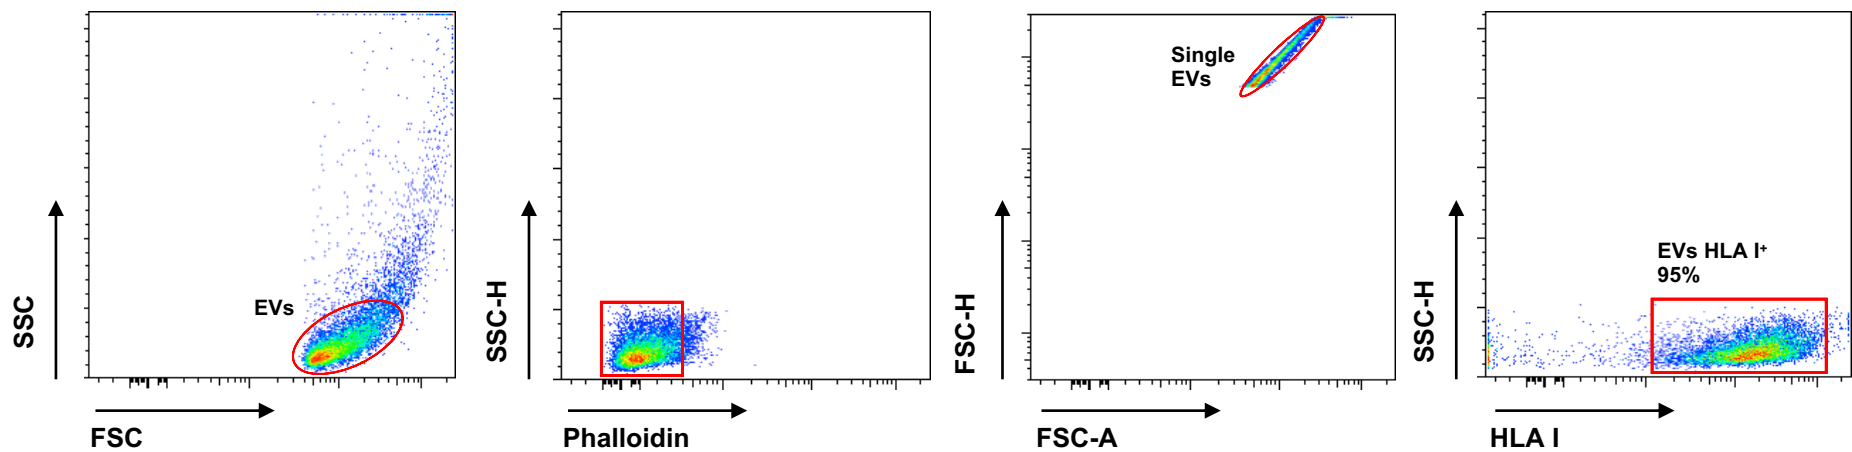**b**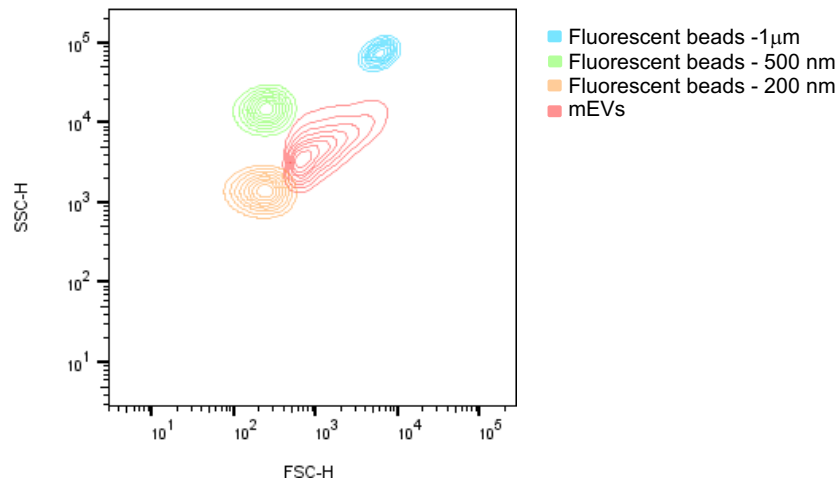

### Supplementary Figure S1. Gating strategy of mEVs isolated from MM cell line ARK.

About 1-5  $\mu$ g of mEVs were labelled with FITC/Phalloidin in combination with specific antibodies. **a)** Dot plots showing the gating strategy. The phalloidin negative population was gated and the doublets were removed by plotting FSC-H and FSC-A; HLA I<sup>+</sup> mEVs were gated and on this population the expression of NKG2DLs and CD138 was evaluated. **b)** Fluorescent beads of defined size (i.e: 200 nm, 500 nm and 1  $\mu$ m) were used to visualize the size of the selected mEV population. A representative experiment is shown.

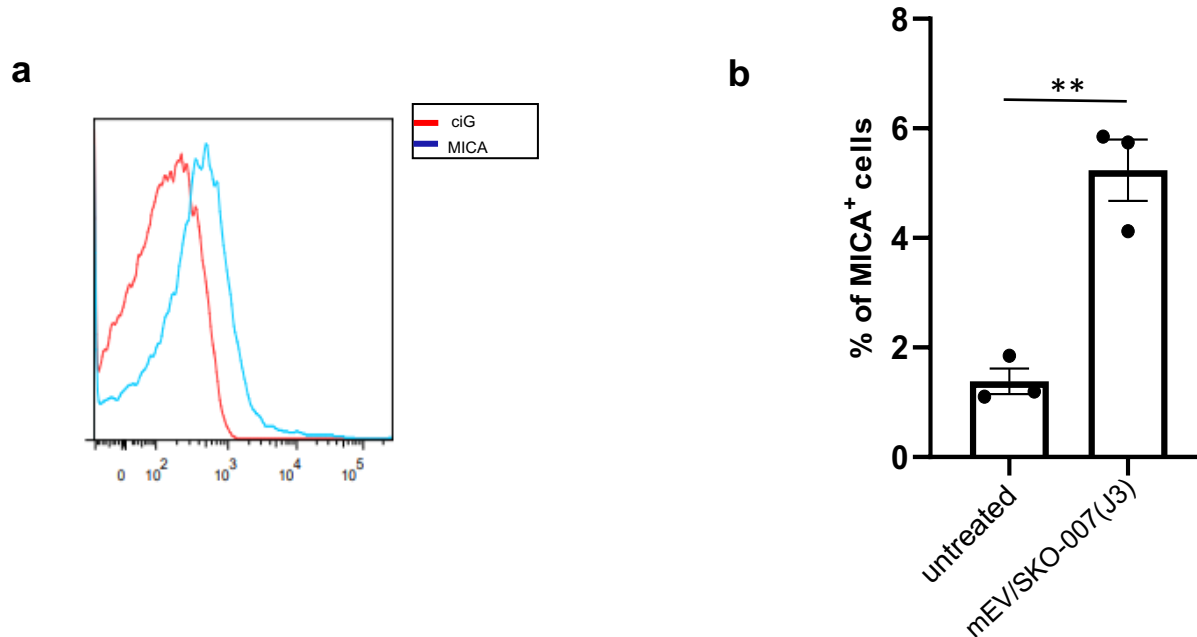

**Supplementary Figure S2. mEVs derived from SKO-007(J3) MM cell line transfer MICA on target cells.** a) About 5–10  $\mu$ g of mEVs derived from the conditioned medium of SKO-007(J3) were labeled with fluorochrome-conjugate  $\alpha$ MICA mAb or with an isotypic ciGg in combination with phalloidin/FITC for 60 min at room temperature. mEVs were washed and analyzed through immunofluorescence and FACS analysis by gating on the phalloidin negative population. A representative experiment is shown. b) LP1 cells were incubated with 20 $\mu$ g/ml of mEVs for 18 hrs; cells were harvested and stained with  $\alpha$ MICA mAb and analyzed through FACS. The percentage of MICA positive cells is shown.

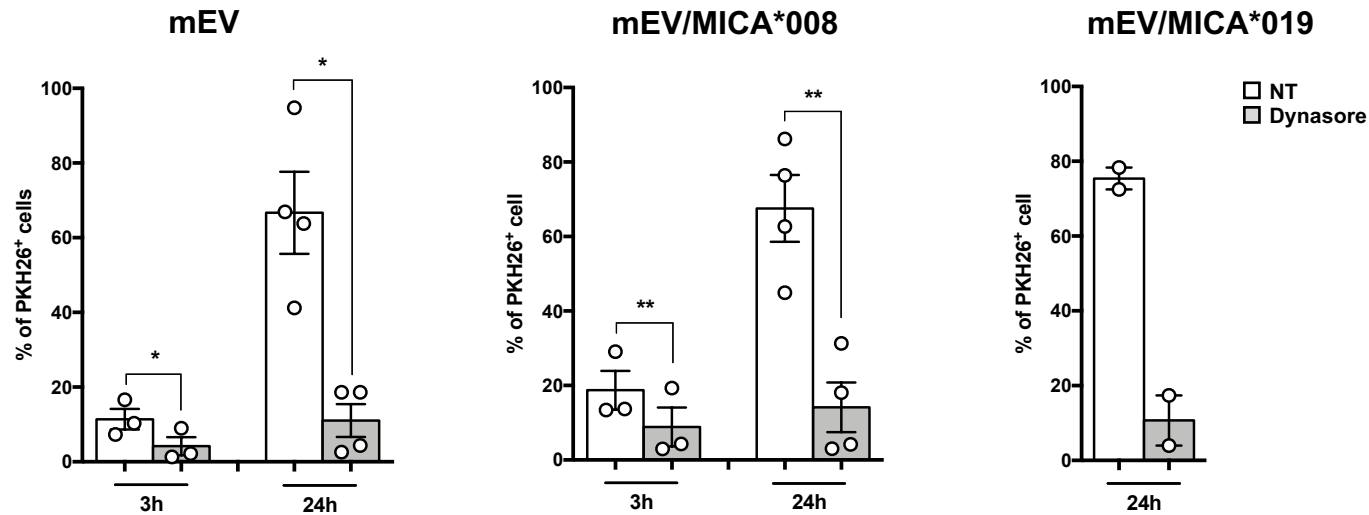

**Supplementary Figure S3. mEV uptake by MM cells occurs through an endocytosis-dependent mechanism.** The MM LP1 cell line was treated as described in Figure 2, panel d using PKH26-labelled mEVs. The percentage of PKH26<sup>+</sup>LP1 cells is shown. Values relative to the mean of at least two independent experiments are shown.

| Patient n. | Sex/age | stage      | Ig                     |
|------------|---------|------------|------------------------|
| 1          | F/48    | Smoldering | IgG-κ                  |
| 2          | M/66    | MGUS       | IgG-λ                  |
| 3          | F/74    | Onset      | IgG-λ                  |
| 4          | M/77    | Onset      | IgG-λ                  |
| 5          | F/70    | Relapse    | IgG-κ                  |
| 6          | M/46    | Onset      | IgA-λ                  |
| 7          | F/71    | Onset      | IgA-κ                  |
| 8          | M/75    | Relapse    | IgA-λ                  |
| 9          | M/60    | Onset      | IgA-λ                  |
| 10         | F/79    | Onset      | IgA-λ                  |
| 11         | M/83    | Onset      | IgG-κ                  |
| 12         | F/62    | MGUS       | IgA-κ                  |
| 13         | F/72    | Onset      | Light chain<br>myeloma |

**Supplementary Figure S4. Characteristics of MM patients.**

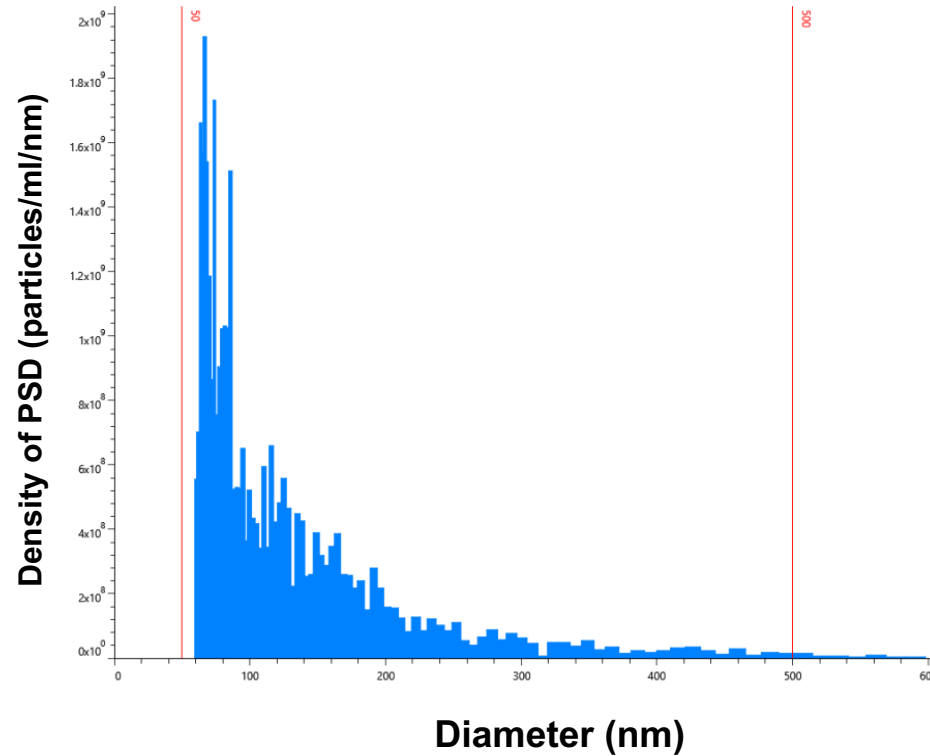

**Supplementary Figure S5. Size distribution of mEVs isolated from plasma of MM patients.** The size distribution was performed using a ViewSizer™ 3000 (HORIBA Instruments incorporated, Irvine CA, USA). A representative sample derived from BM plasma is shown. The average diameter of EV population corresponds to  $140 \pm 20$  nm.
